# Supplementary material for: The application of a solid basic catalyst produced through the adsorption of red mud solution onto SiO2 for the production of biodiesel
Source: Research Square preprint supplement (doi:10.21203/rs.3.rs-7421017/v1), 2025-08-26
Supplement: Supplementary file 1 [file 53cc930678cd970f20fe0d29.docx]

**The application of a solid basic catalyst produced through the adsorption of red mud solution onto SiO2 for the production of biodiesel**

Moises Pedro1, David Lee Nelson1, Lucas Pacônio1, Milton de Souza Freitas1, Alexandre P. Wentz1, Daniel A. Bortoleto1, Fernando L. P. Pessoa2, Foster A. Agblevor3, Maria B. de Freitas-Marques5, Lucas D. Zanatta6, Sandro L. Barbosa1*.

1Department of Pharmacy, Universidade Federal dos Vales do Jequitinhonha e Mucuri-UFVJM, Campus JK, Rodovia MGT 367 - Km 583, nº 5.000, Alto da Jacuba, CEP 39100-000, Diamantina/MG, Brazil. e-mail: moises.pedro@ufvjm.edu.br (M.P.); [dleenelson@gmail.com](mailto:dleenelson@gmail.com) (D.L.N.); lucas.paconio@ufvjm.edu.br (L.P.S.); freitas.milton@hotmail.com (M.S.F.); [wentzap@hotmail.com](mailto:wentzap@hotmail.com) (A.P.W.); dabortoleto@yahoo.com.br (D.A.B.); [sandro.barbosa@ufvjm.edu](mailto:sandro.barbosa@ufvjm.edu) (S.L.B.)

2Centro Universitário SENAI-CIMATEC, Av. Orlando Gomes, 1845, Piatã, Salvador 41650-010, Brazil;

fernando.pessoa@fieb.org.br (F.L.P.P.)

3Utah State University, 620 East 1600 North, Suite 130, Logan UT 84341, U.S.A.; foster.agblevor@usu.edu (F.A.A.)

4Departamento de Alimentos e Medicamentos, Faculdade de Ciências Farmacêuticas, Universidade Federal de Alfenas, Alfenas - Minas Gerais - Brazil. e-mail: [betanialf@hotmail.com](mailto:betanialf@hotmail.com) (M.B.F.M.)

5Laboratório de Química Bioinorgânica, Departamento de Química, Faculdade de Filosofia, Ciências e Letras de Ribeirão Preto, Universidade de São Paulo, Av. Bandeirantes, 3900, 14040-901 Ribeirão Preto-SP, Brazil. e-mail: lucaszanatta@alumni.usp.br (L.D.Z.)

*Corresponding author. Tel.: +55-38-35321234; fax: +55-38-35321234; e-mail: [sandro.barbosa@ufvjm.edu.br](mailto:sandro.barbosa@ufvjm.edu.br)

_____________________________________________________________________________________

**Abstract**: A catalyst (SiO2-RMS) composed of basic silica gel (SiO2) with red mud solution (RMS), which is a waste alkaline solution, was prepared. The SiO2-RMS was characterized by FT-IR, SEM, XRD, XRF, BET and TG/DTA analysis. Basicity was determined using the Hammett titration. The SiO2-RMS catalyst was employed for the synthesis of biodiesel (FAME - fatty acid methyl esters). Triglycerides from waste cooking oil (WCO) were treated with MeOH, 1:18 molar ratio of WCO/MeOH, at 60 oC during 90 min in the presence of 10.0% (w/w) SiO2-RMS:WCO to yield mixtures of FAMEs. The use of SiO2-RMS catalyst resulted in a 100% conversion of WCO to FAME. The catalyst was reused in four more transesterification reactions with excellent yields. The reaction times after the first reaction cycle were longer: second cycle 2:30 h, third cycle 4:30 h and fourth cycle 8:30 h. The catalyst is obtained from inexpensive, easily prepared, recyclable and environmentally friendly waste material (waste management). The protocol is highly significant from green and sustainable chemistry perspectives because the reaction involves a renewable catalyst and solvent-free reaction conditions.

*Keywords:* modification of silica; alkaline catalyst; reusable catalyst; environmentally friendly process; red mud; fatty acid methyl esters.

_____________________________________________________________________________________

**Copies of spectra**

1) WCO





a – methyl protons

b – methyl protons of lonilenic acid

c – methylene protons of fatty acids of tryacylclycerol

d – β-carboxylic protons

e – allylic protons outside

f – α-carboxylic protons

g – internal allylic protons

h + i – methylenic protons of the glycerol

j – H-2 proton of glycerol methylenic

k – olefinic protons

k

j

i

h

g

f

e

d

c

b

a

Figure SM 1. 1H NMR WCO.





D

B

A

C

E

A – Aliphatics

B – CH2-O

C – CH-O

D – Olefin

E – Triglyceride carboxyls

Figure SM 2. 13C NMR WCO.

2) FAME (Fatty acid methyl ester)

a – terminal methyl protons

b + c – backbone methylenes

d – β-carboxylic protons (methylene to ester)

e – α-carboxylic protons (methylene to double bond)

f – α-methylene to ester

g – bis-allylic protons

h – methoxy protons

i – olefinic protons

i

h

g

f

e

d

b

c

a

A – Methylene & methyl carbons

B – Methoxy carbon

C – olefinic carbons

D – Carbonyl carbons

D

C

B

A





i

h

g

f

e

d

c

b

a

a – terminal methyl protons

b + c – backbone methylenes

d – β-carboxylic protons (methylene to ester)

e – α-carboxylic protons (methylene to double bond)

f – α-methylene to ester

g – bis-allylic protons

h – methoxy protons

i – olefinic protons

Figure SM 3. 1H NMR FAME using SiO2-RMS.





A – Methylene & methyl carbons

B – Methoxy carbon

C – olefinic carbons

D – Carbonyl carbons

D

C

B

A

Figure SM 4. 13C NMR FAME using SiO2-RMS as catalyst.
